# Supplementary material
Source: PubMed Central journal article supplement (PMC1829241)

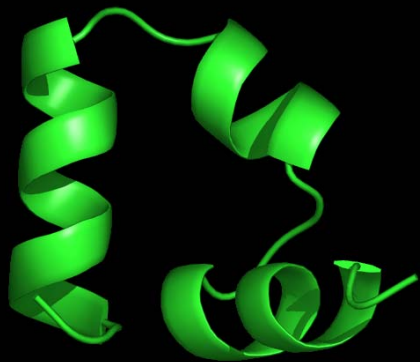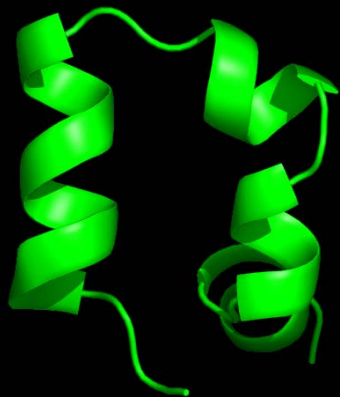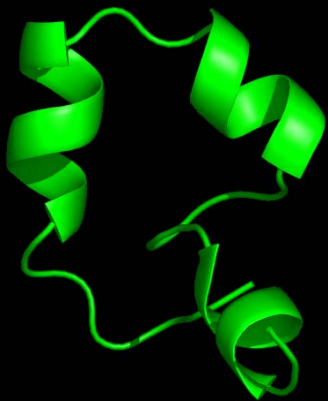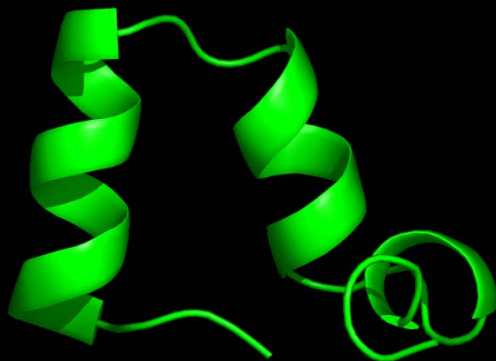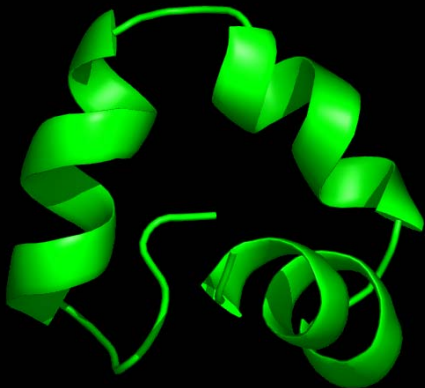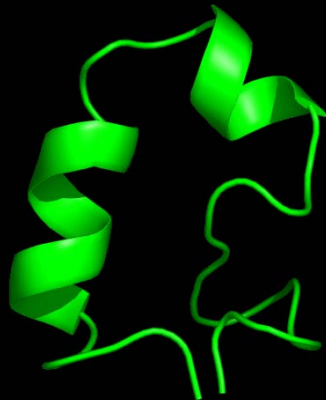

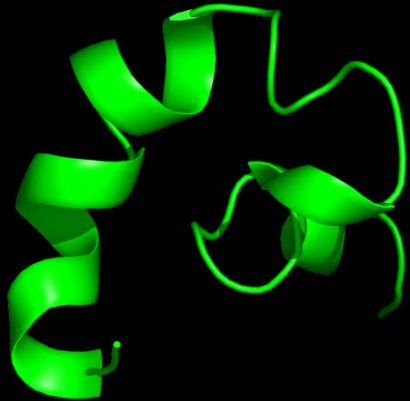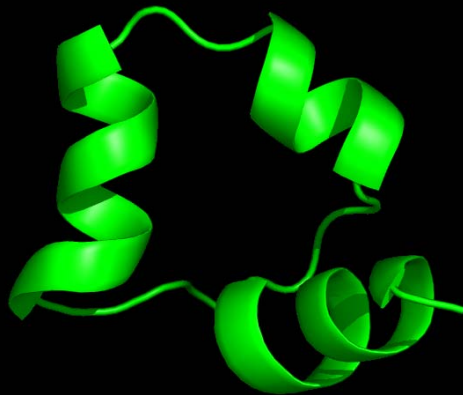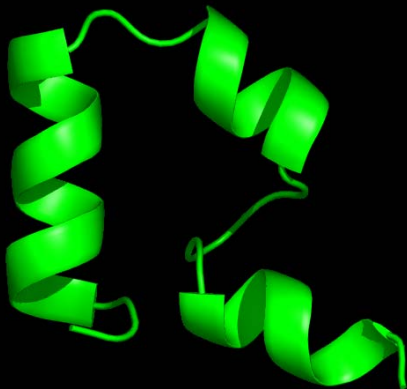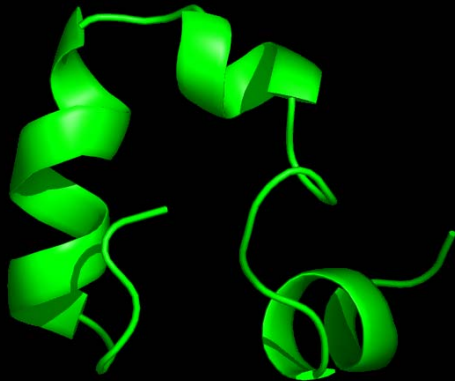

Supplement: pnas_0608432104_1.pdf [file pnas_0608432104_1.pdf]
